# Supplementary material for: Development of a Sericin Hydrogel to Deliver Anthocyanins from Purple Waxy Corn Cob (Zea mays L.) Extract and In Vitro Evaluation of Anti-Inflammatory Effects
Source: MDPI journal article supplement (doi:10.3390/pharmaceutics14030577), 2022-03-06
Supplement: s1 [file s1]

# Supplementary Materials: Development of a Sericin Hydrogel to Deliver Anthocyanins from Purple Waxy Corn Cob (*Zea mays* L.) Extract and In Vitro Evaluation of Anti-Inflammatory Effects

Nattawadee Kanpipit, Natsajee Nualkaew, Worawikunya Kiatpongarp, Aroonsri Priprem and Suthasinee Thapphasaraphong

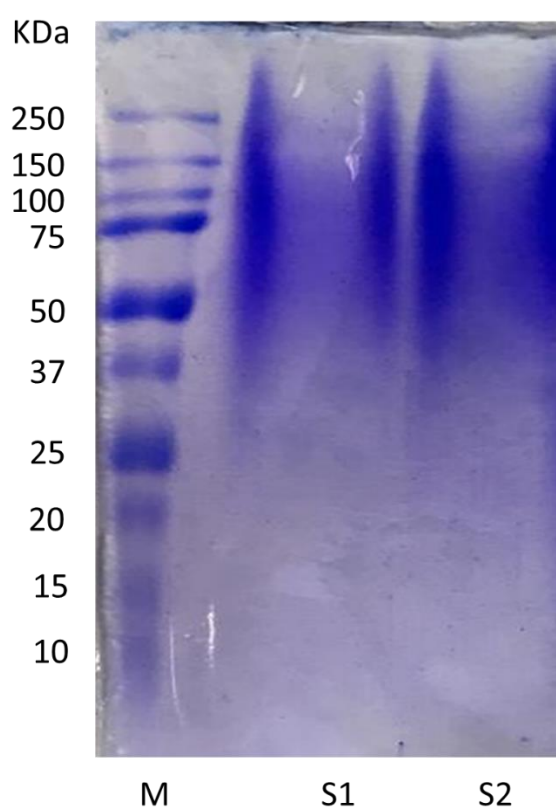

**Figure S1.** SDS-PAGE analysis of sericin extracted from silkworm cocoons (J108) by a High Temperature and High Pressure Degumming.

M = Protein marker,

S1 = Sericin extracted from silkworm cocoons (J108) by a High Temperature and High Pressure Degumming before storage condition (4 °C, 1 year)

S2 = Sericin extracted from silkworm cocoons (J108) by a High Temperature and High Pressure Degumming after storage condition (4 °C, 1 year)

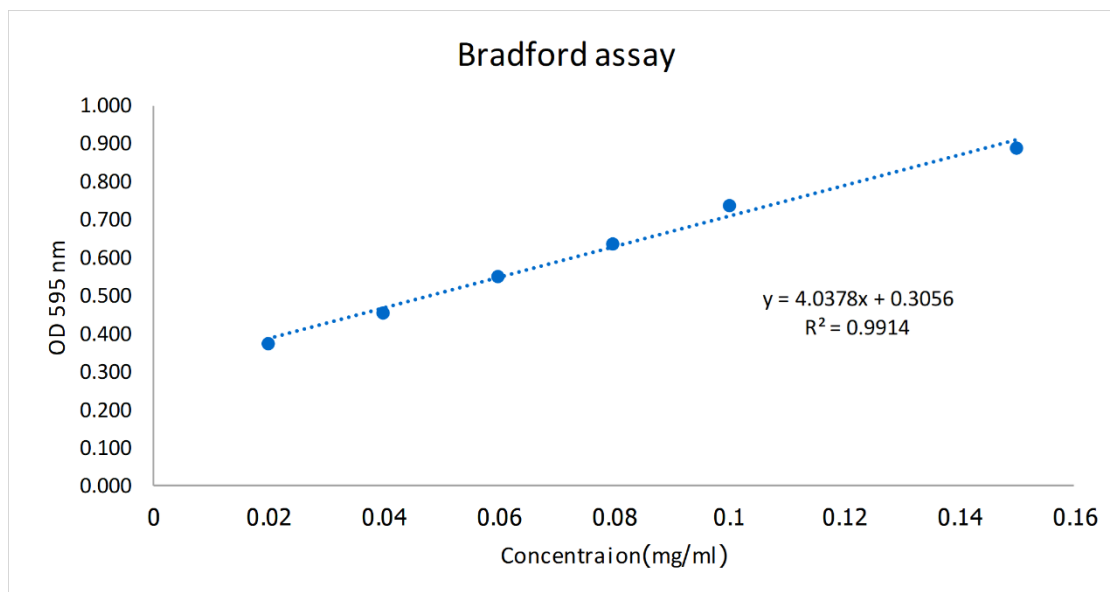

**Figure S2.** Standard curve of Bovine serum albumin (BSA) for protein content by Bradford assay.

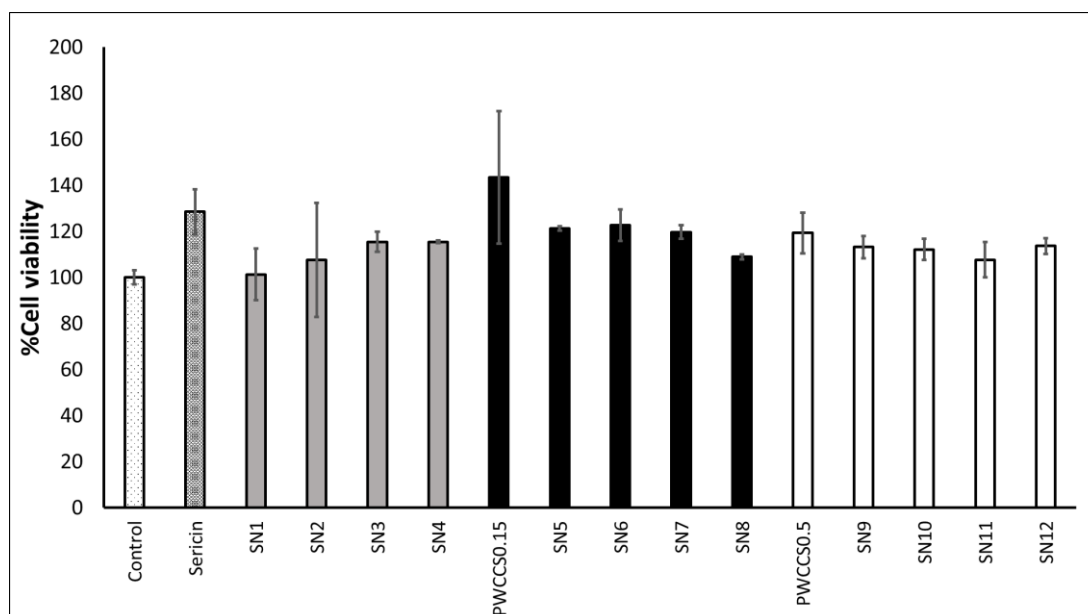

**Figure S3.** Effect of sericin, purple waxy corn cob extract solution 0.15% and 0.5% (PWCCS0.15 and PWCCS0.5), sericin-hydrogel formulations (SN1-SN12) on cell viability of RAW 264.7 cells. Data represent the mean  $\pm$  SEM of three replicates.

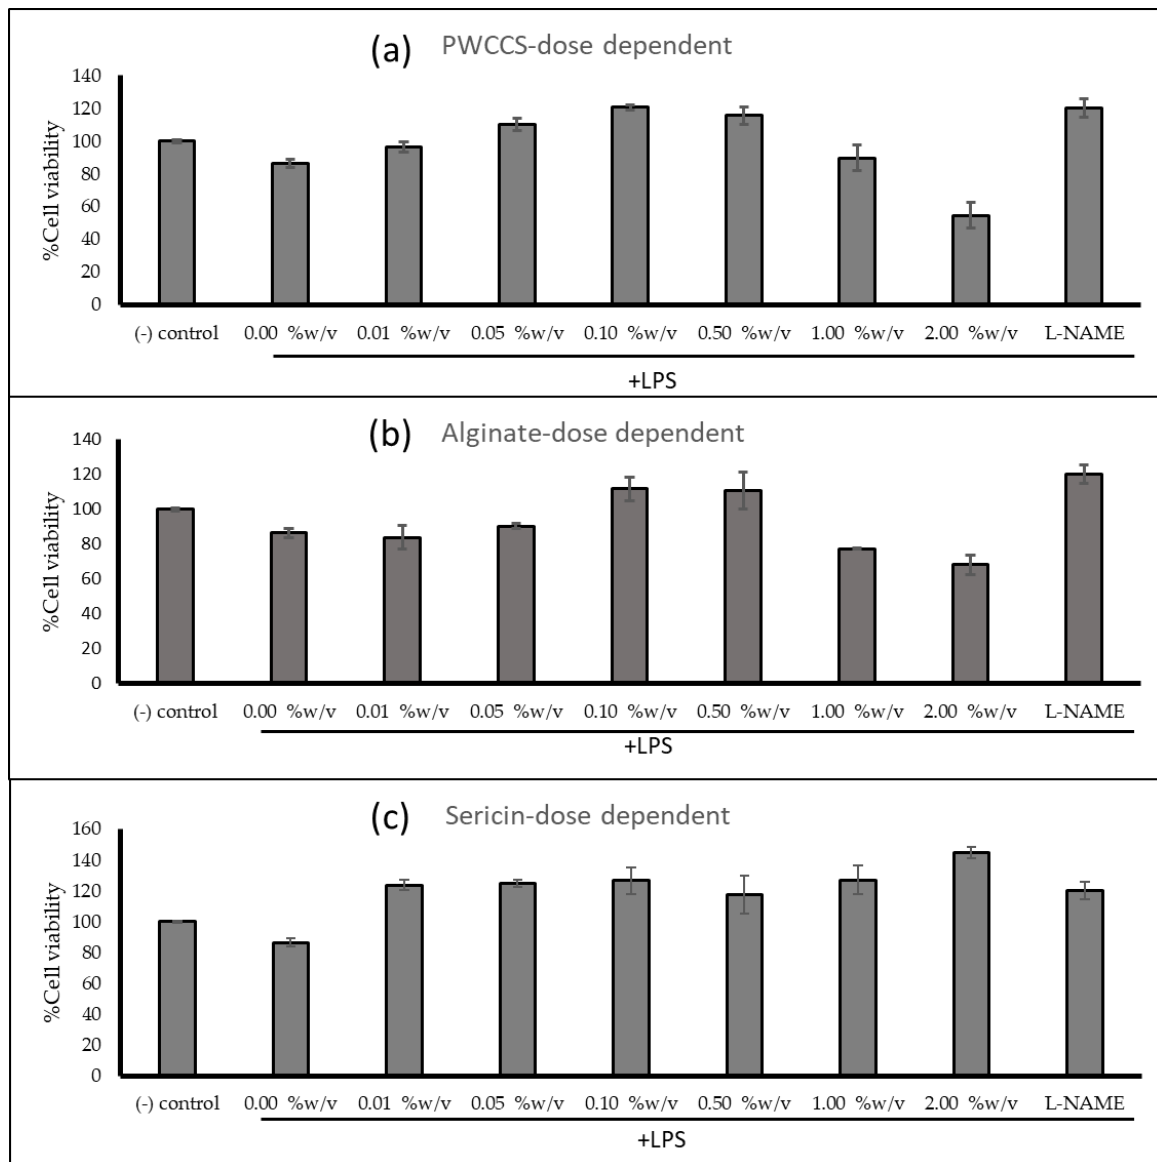

**Figure S4.** The %cell viability on LPS-stimulated RAW 264.7 cells for 0-2%w/v of PWCCS (a), alginate (b) sericin (c) and L-NAME 200  $\mu$ M. Data represent the mean  $\pm$  SEM of three replicates.

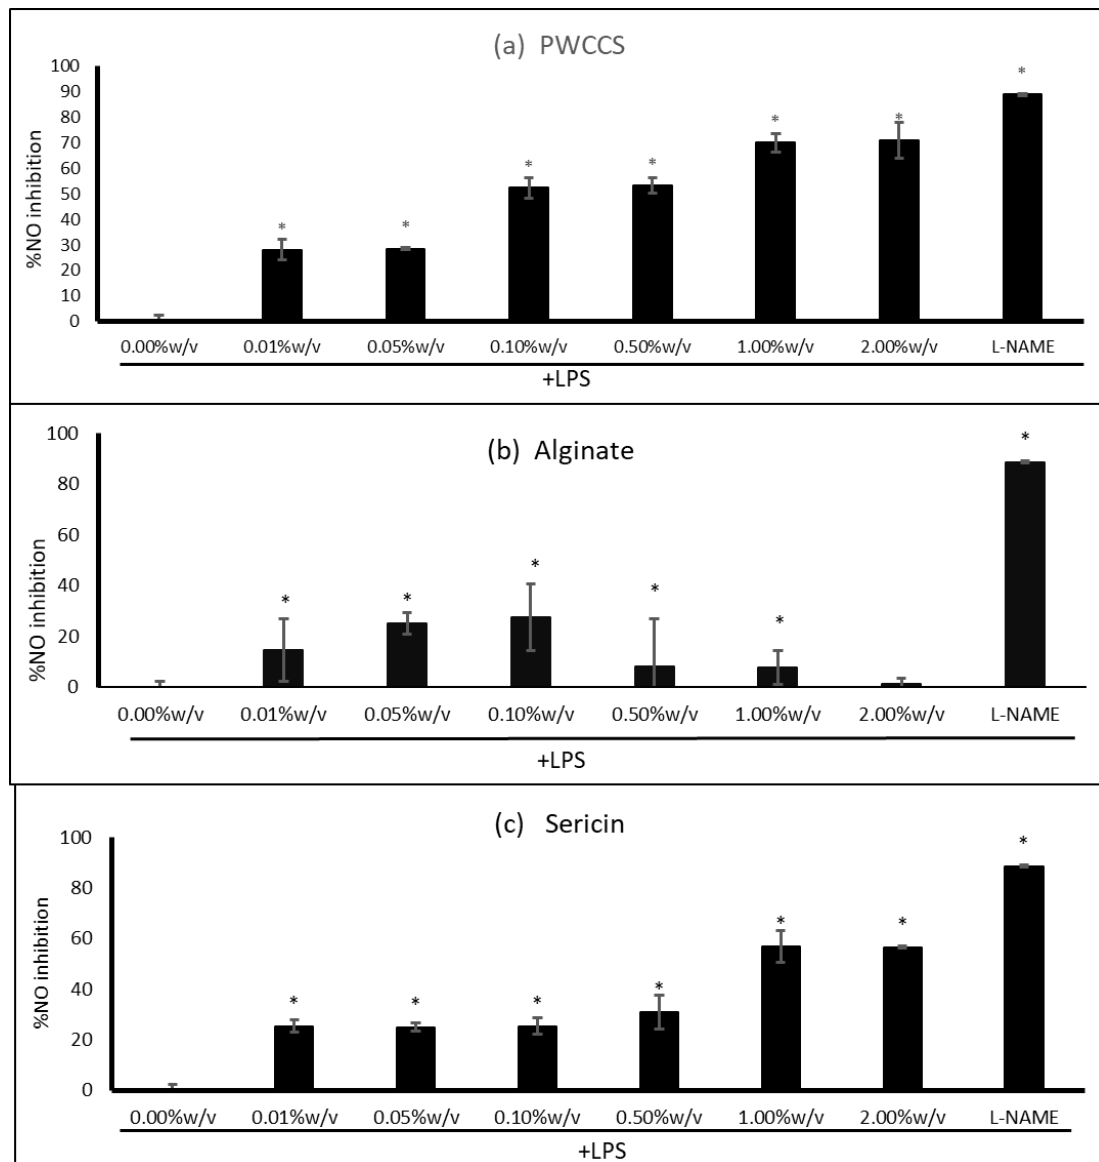

**Figure S5.** NO inhibition of extracts on LPS-stimulated RAW 264.7 cells (a) PWCCS (b) Alginate (c) Sericin and L-NAME 200  $\mu$ M. Data represent the mean  $\pm$  SEM of three replicates. (\*  $p < 0.05$ , compared with compared with LPS treated cells (0%w/v)).

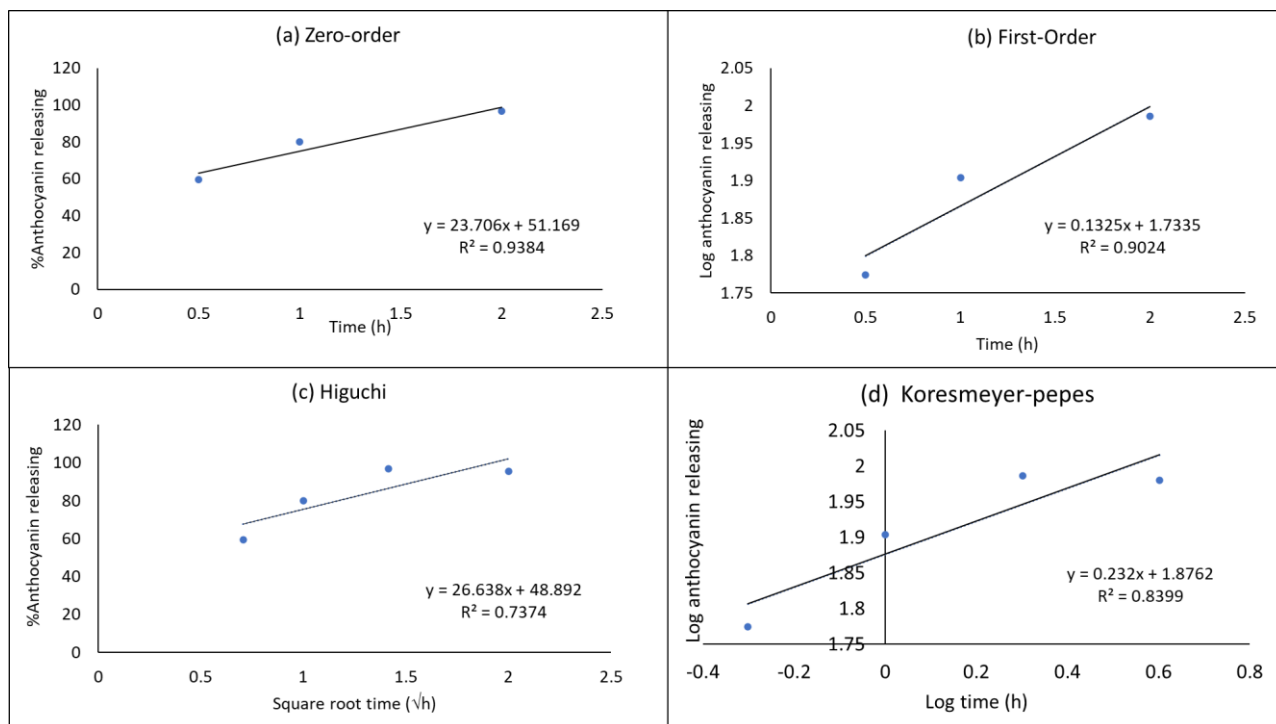

**Figure S6.** The kinetic model prediction of releasing for 0.15%PWCCS: (a) Zero order, (b) First order, (c) Higuchi and (d) Korsmeyer-Peppas.

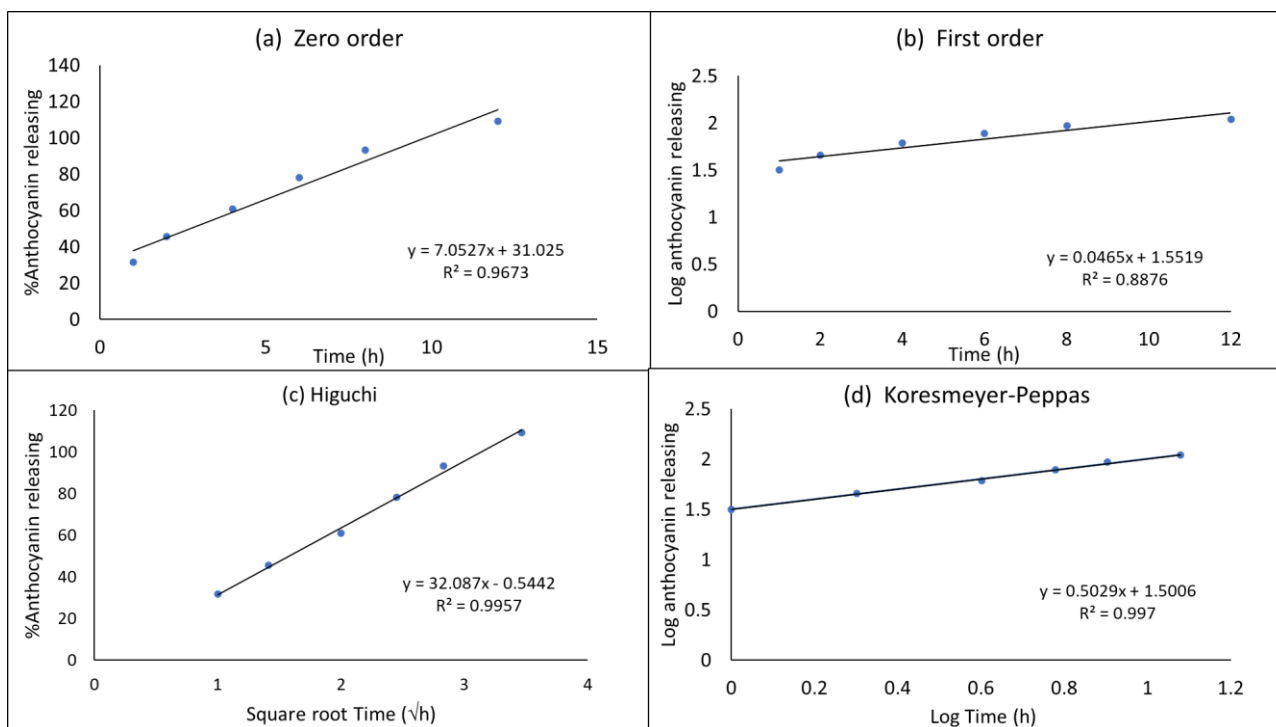

**Figure S7.** The kinetic model prediction of releasing for SN5: (a) Zero order, (b) First order, (c) Higuchi and (d) Korsmeyer-Peppas.

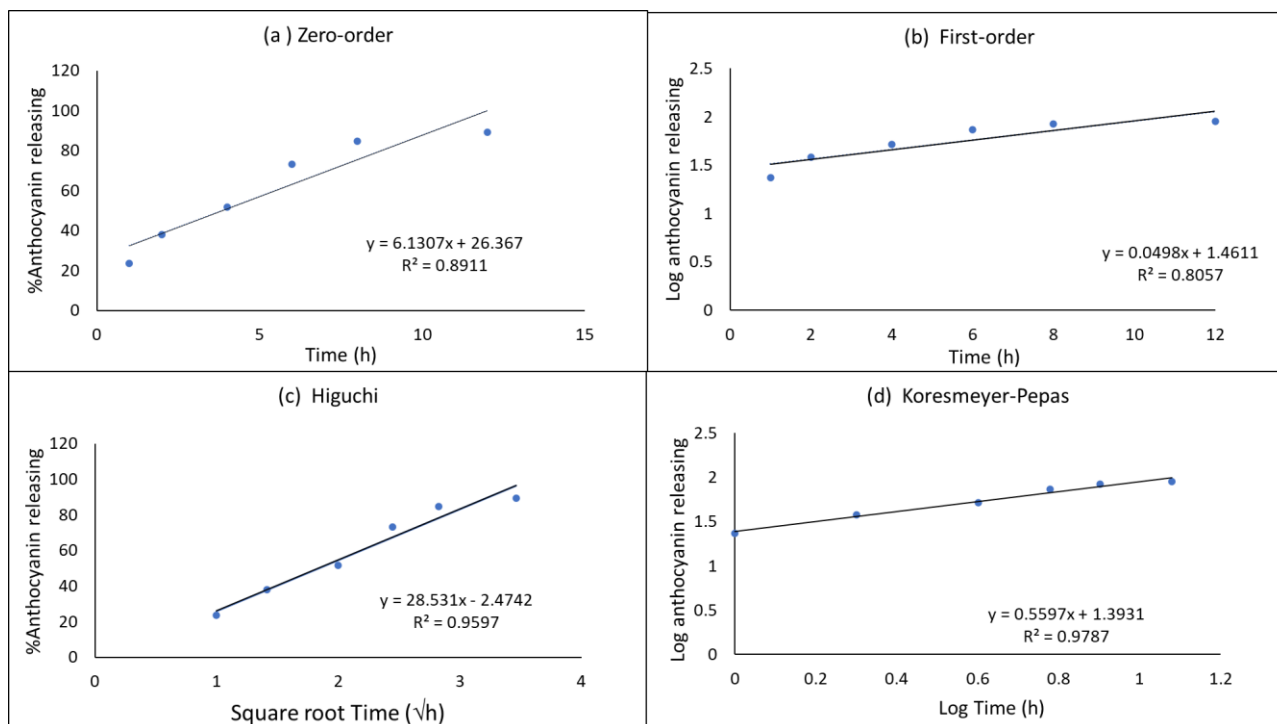

**Figure S8.** The kinetic model prediction of releasing for SN6: (a) Zero order, (b) First order, (c) Higuchi and (d) Korsmeyer-Peppas.

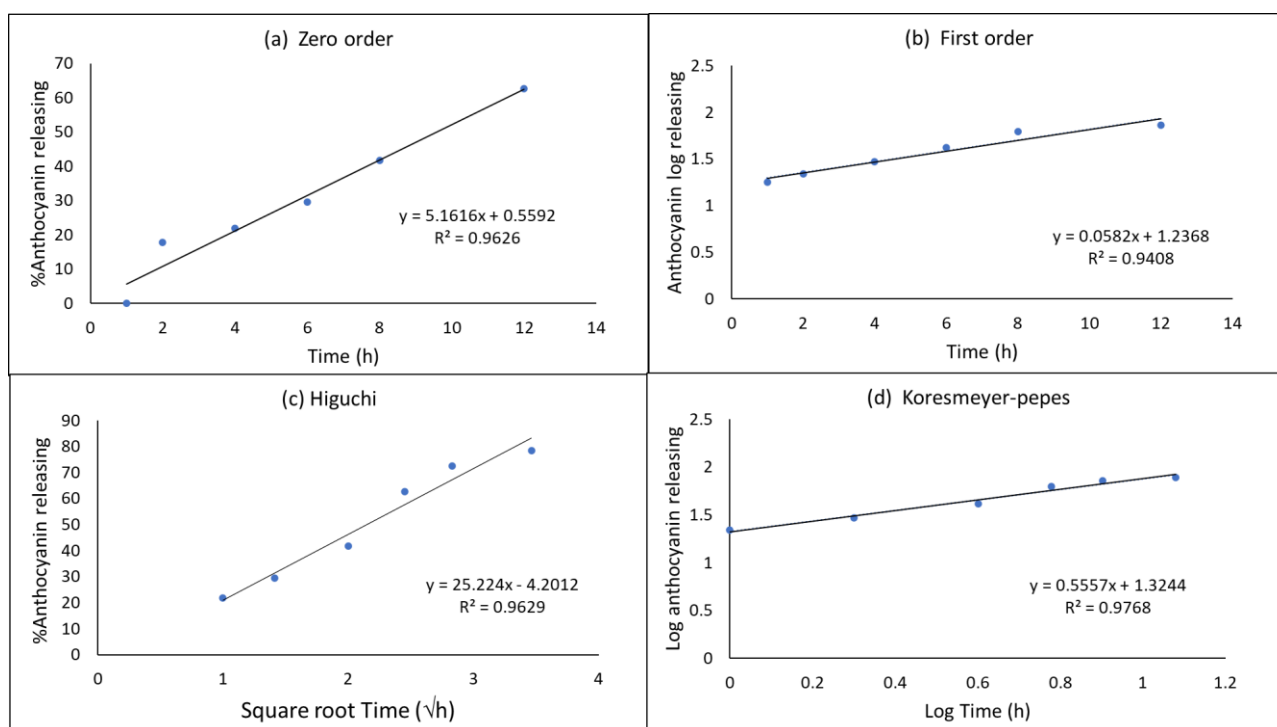

**Figure S9.** The kinetic model prediction of releasing for SN7: (a) Zero order, (b) First order, (c) Higuchi and (d) Korsmeyer-Peppas.

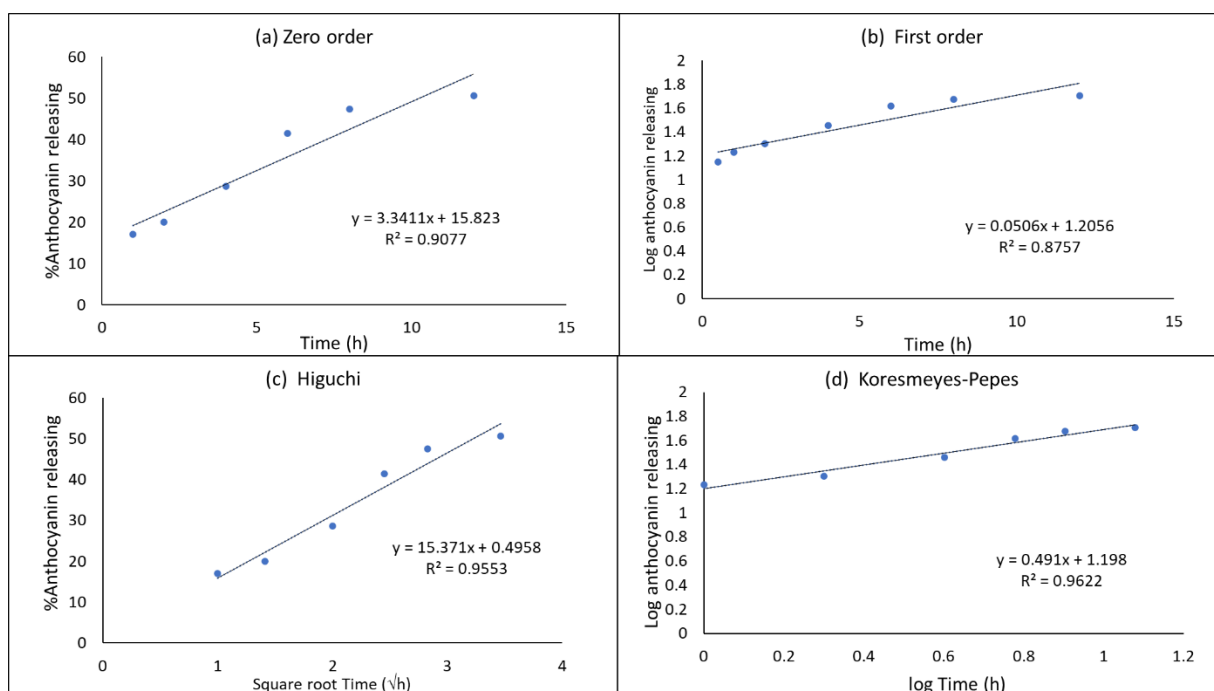

**Figure S10.** The kinetic model prediction of releasing for SN8: (a) Zero order, (b) First order, (c) Higuchi and (d) Korsmeyer-Pepes.

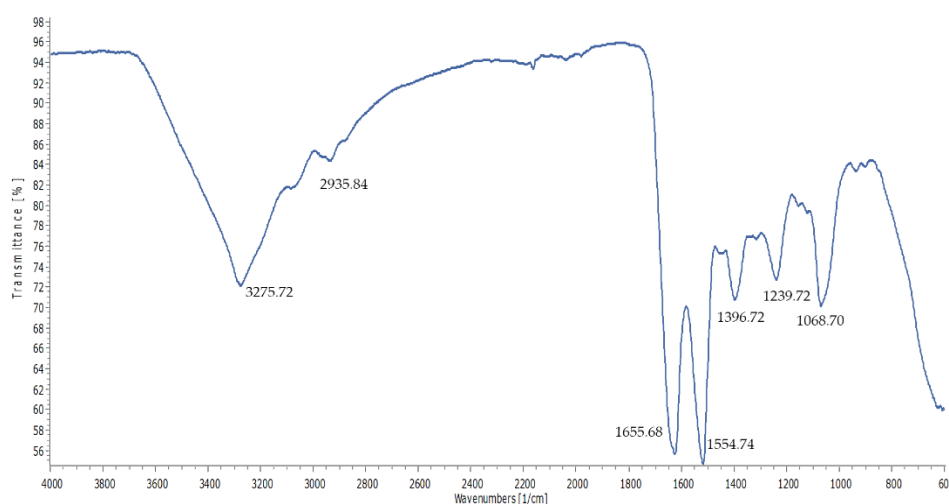

| Sericin (cm <sup>-1</sup> ) | Functional groups                                                                |
|-----------------------------|----------------------------------------------------------------------------------|
| 3275.72                     | O–H stretch (overlap with NH-stretching)                                         |
| 2935.84                     | C H stretch (asymmetric)                                                         |
| 1655.68                     | Amide I, C=O                                                                     |
| 1554.74                     | Amide II, N–H bending, C–N stretching                                            |
| 1396.72                     | C–H, OH bending (corresponding to OH groups of serine and threonine side chains) |
| 1239.72                     | Amide III, C–N stretching, C=O bending                                           |
| 1068.70                     | C-OH stretching                                                                  |

**Figure S11.** IR spectrum of sericin

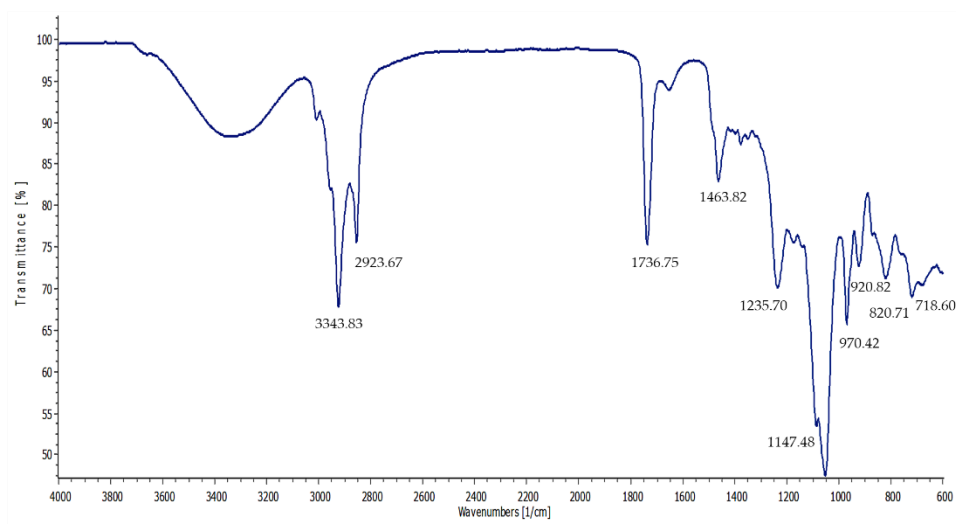

| Purple corn cob extracts (cm <sup>-1</sup> ) | Functional groups         |
|----------------------------------------------|---------------------------|
| 3343.83                                      | O–H stretch (phenolic OH) |
| 2923.67                                      | C–H stretch               |
| 1736.75                                      | C=O stretch               |
| 1463.82                                      | C–H bend                  |
| 1235.70                                      | C–O–stretch               |
| 1147.48                                      | C–O–O stretch             |
| 970.42                                       | C–H bending               |
| 920.82                                       | C–H bending               |
| 820.71                                       | C–H bending               |

**Figure S12.** IR spectrum of Purple waxy corn cob extracts (PWCC)



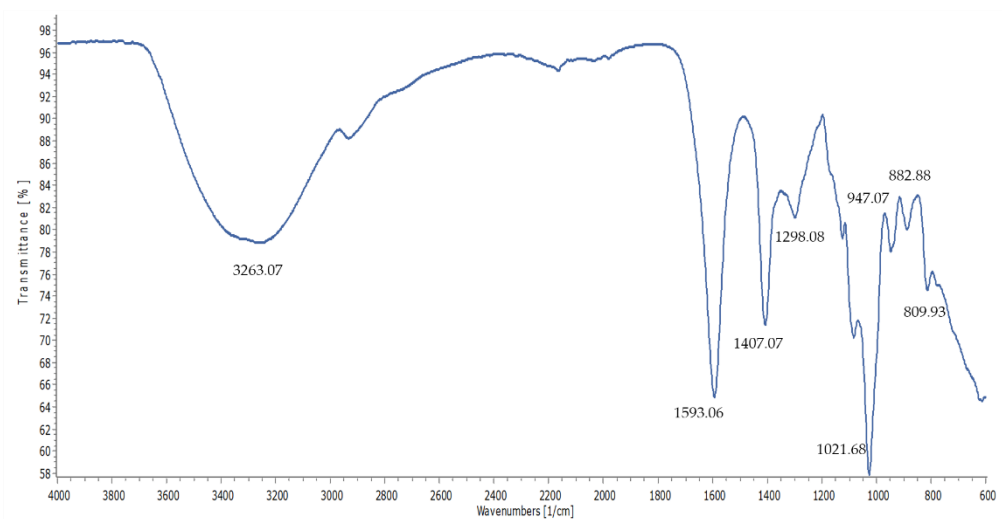

| Alginate (cm <sup>-1</sup> ) | Functional groups            |
|------------------------------|------------------------------|
| 3263.07                      | O–H stretch (polysaccharide) |
| 1593.06                      | C–O–O stretch (asymmetric)   |
| 1407.07                      | C–O–O stretch(symmetric)     |
| 1298.08                      | C–H bending                  |
| 1021.68                      | C–O stretch                  |
| 947.08                       | C–H bending                  |
| 882.88                       | C–H bending                  |
| 809.93                       | C–H bending                  |

**Figure S13.** IR spectrum of Alginate

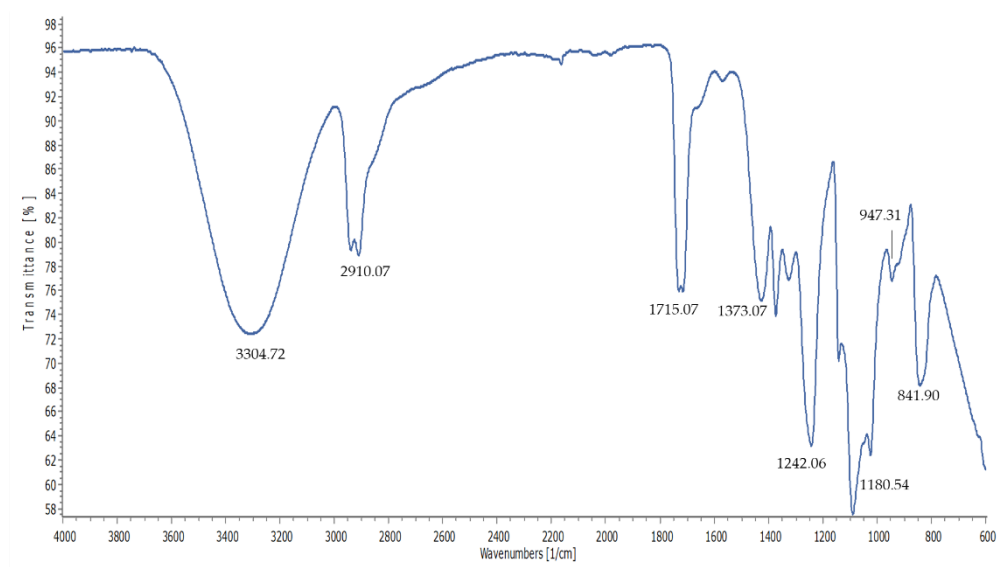

| PVA ( $\text{cm}^{-1}$ ) | Functional groups            |
|--------------------------|------------------------------|
| 3304.72                  | O-H stretch                  |
| 2910.07                  | C-H stretch of $\text{CH}_2$ |
| 1715.07                  | C=O stretch                  |
| 1373.07                  | C-O stretching               |
| 1242.06                  | C-C stretch                  |
| 1180.54                  | C-OH stretch                 |
| 947.31                   | $\text{CH}_2$ rocking        |
| 841.90                   | C-C stretching               |

**Figure S14.** IR spectrum of PVA

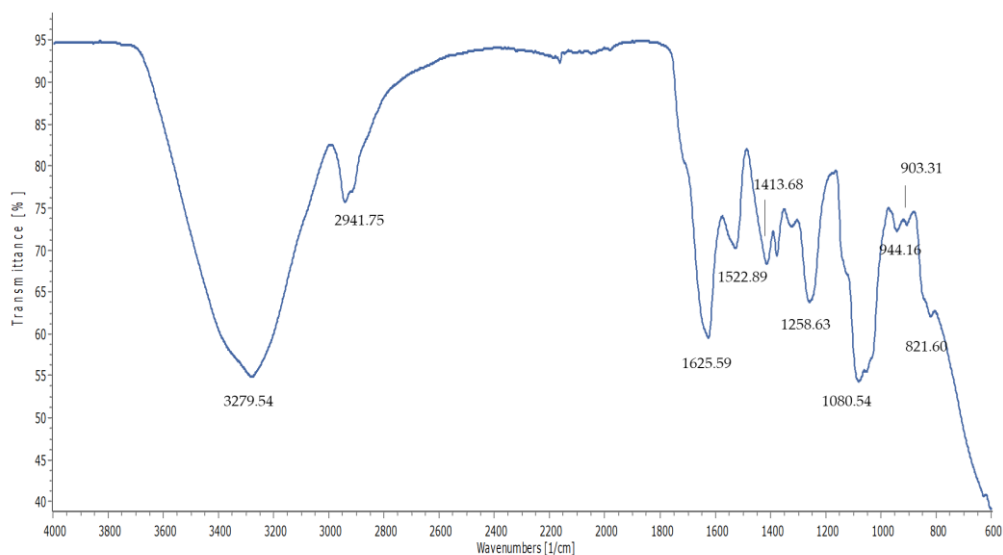

| SN2 (cm <sup>-1</sup> ) | Functional group                       |
|-------------------------|----------------------------------------|
| 3279.54                 | O-H Stretch                            |
| 2941.75                 | C-H Stretch                            |
| 1625.59                 | Amide I, C=O (β-sheet structure))      |
| 1522.89                 | Amide II, N-H bending, C-N stretching  |
| 1413.68                 | C-H, O-H bending                       |
| 1258.63                 | Amide III, C-N stretching, C=O bending |
| 1080.54                 | C-OH stretching                        |
| 944.16                  | C-H bending                            |
| 903.31                  | C-H bending                            |

**Figure S15.** IR spectrum of SN2

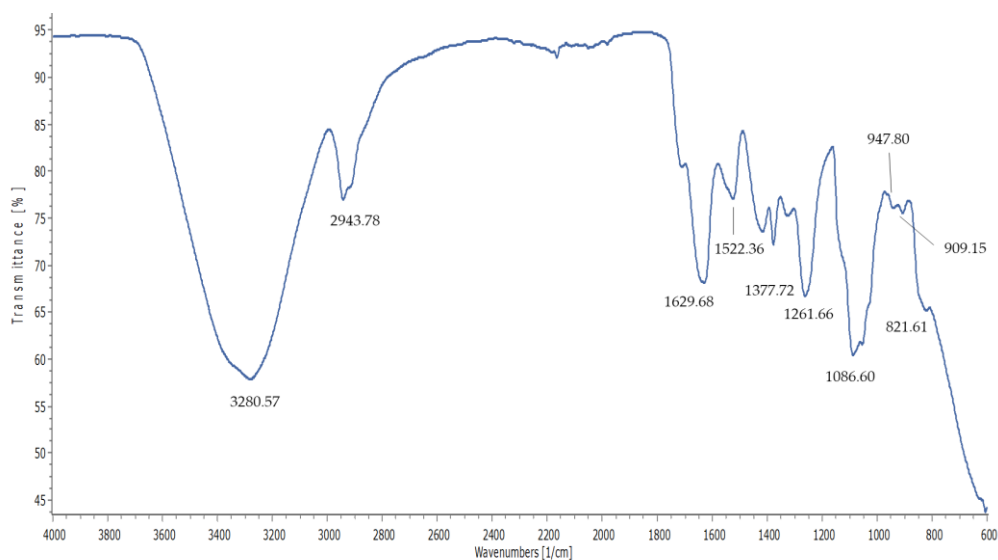

| SN6 (cm <sup>-1</sup> ) | Functional group                          |
|-------------------------|-------------------------------------------|
| 3280.57                 | O-H Stretch                               |
| 2943.78                 | C-H Stretch                               |
| 1629.68                 | Amide I, C=O ( $\beta$ -sheet structure)) |
| 1522.36                 | Amide II, N-H bending, C-N stretching     |
| 1377.72                 | C-H, OH bending                           |
| 1261.66                 | Amide III, C-N stretching, C=O bending    |
| 1086.60                 | C-OH stretching                           |
| 947.80                  | C-H bending                               |
| 909.15                  | C-H bending                               |
| 821.61                  | C-H bending                               |

**Figure S16.** IR spectrum of SN6

**Table S1.** The protein content before and after storage condition.

| Sample  | Storage at 4°C for 1 year |              |
|---------|---------------------------|--------------|
|         | Before (mg/g)             | After (mg/g) |
| Sericin | 29.28±0.50                | 29.05±0.13   |

Data represent the mean  $\pm$  SEM of three replicates. The comparison in stability test was evaluated by Paired sample *t*-test. A *p*-value of less than 0.05 was considered statistically significant. Protein content of sericin extract before and after storage condition have no significant difference.
